# Supplementary material for: Pharmacological Gq inhibition induces strong pulmonary vasorelaxation and reverses pulmonary hypertension
Source: PubMed Central journal article supplement (PMC11319782; doi:10.1038/s44321-024-00096-0), 2024-07-08
Supplement: 44321_2024_96_MOESM11_ESM.pdf [file 44321_2024_96_MOESM11_ESM.pdf]

## Expanded View Figures

**Figure EV1. FR prevents 5-HT-induced constriction and  $G\alpha_q/G\alpha_{11}$  can be downregulated by lentiviral transduction.**

(A) Original traces of 5-HT dose-response curves ( $10^{-9}$ M– $10^{-5}$ M) after pre-incubation with DMSO, Ket ( $10^{-6}$ M) or FR ( $10^{-6}$ M) in PAs. (B) PCR analysis of Gq protein subtypes in native mPASMCs and mPASMCs transduced with lentiviral sh-G11, sh-Gq RNA (negative controls). Murine lung tissue was used as positive control.

(C–F) Statistical analysis of relative  $G\alpha_{11}$  (C),  $G\alpha_q$  (D),  $G\alpha_i$  (E), and  $G\alpha_s$  (F) mRNA expression in native mPASMCs ( $n = 3$ ) and mPASMCs transduced with lentivirus (sh-control (ctrl), sh-G11, sh-Gq RNA or both,  $n = 3$  independent experiments normalized to 18S housekeeping gene. (G, H) Original Western Blot (G) and analysis (H) of  $G\alpha_{q/11/14}$  protein expression of native mPASMCs and mPASMCs transduced with lentivirus (sh-control (ctrl), sh-G11, sh-Gq RNA or both,  $n = 3$  independent experiments). GAPDH was used as housekeeper. Data information: Values are expressed as mean  $\pm$  SEM. (C–F, H) One-way ANOVA, Tukey's post hoc test. Source data are available online for this figure.

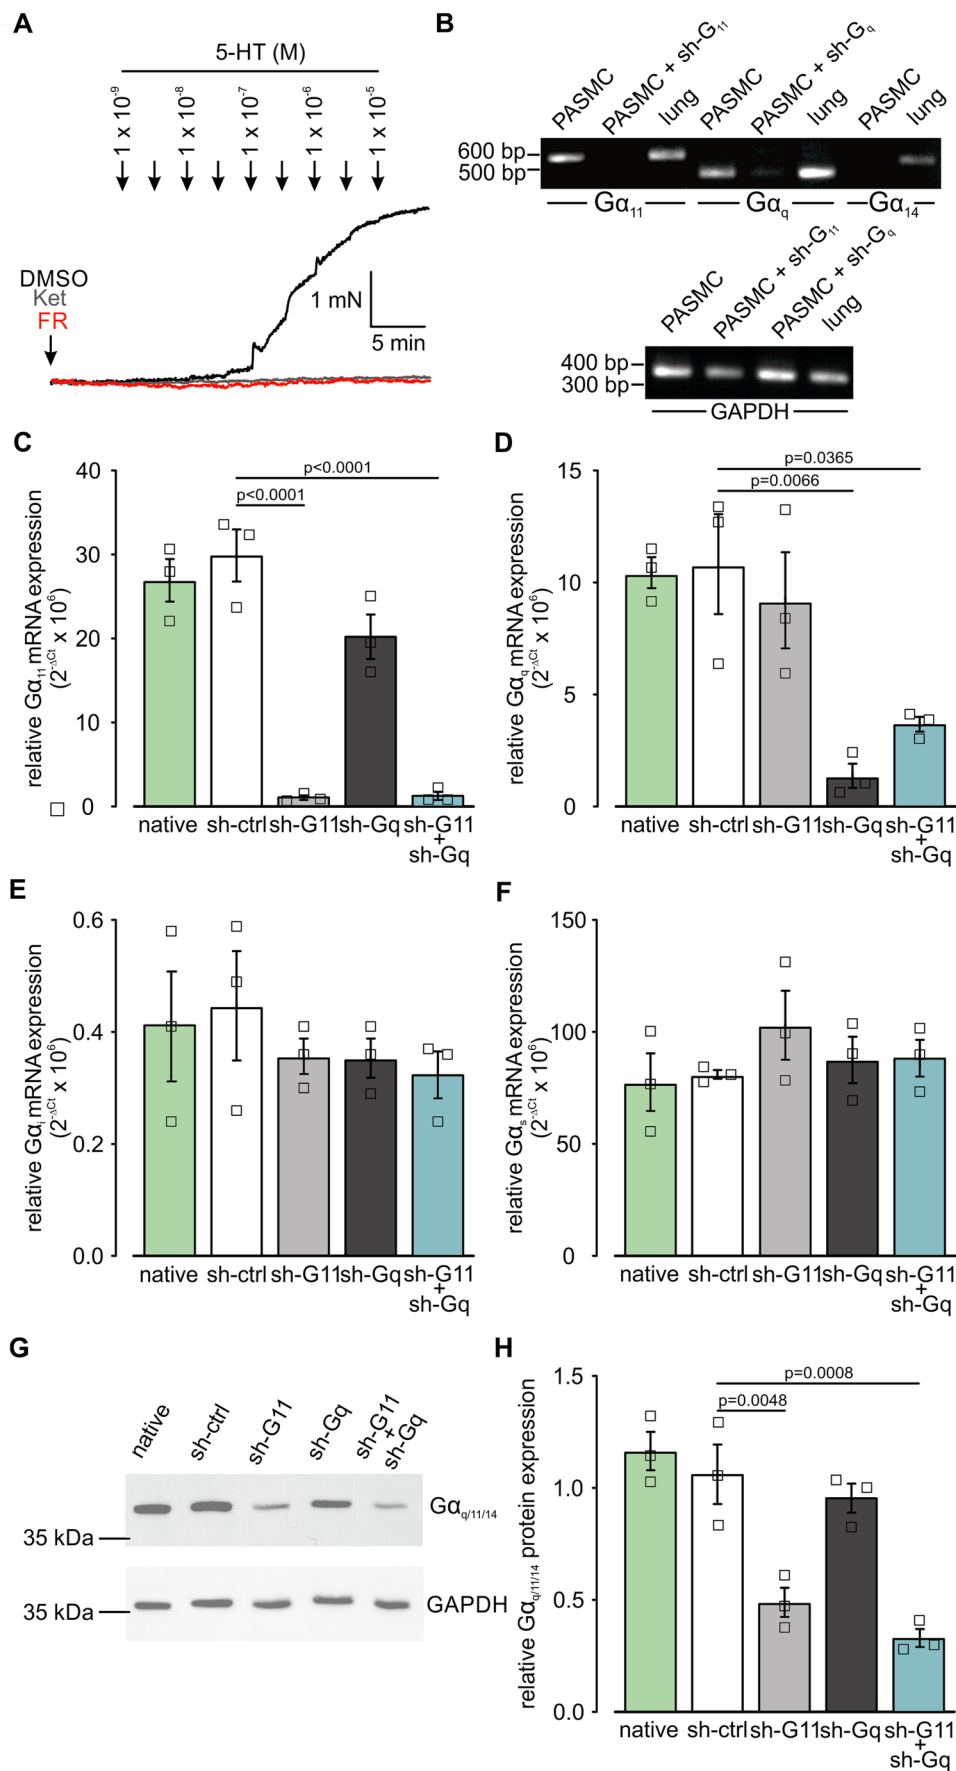

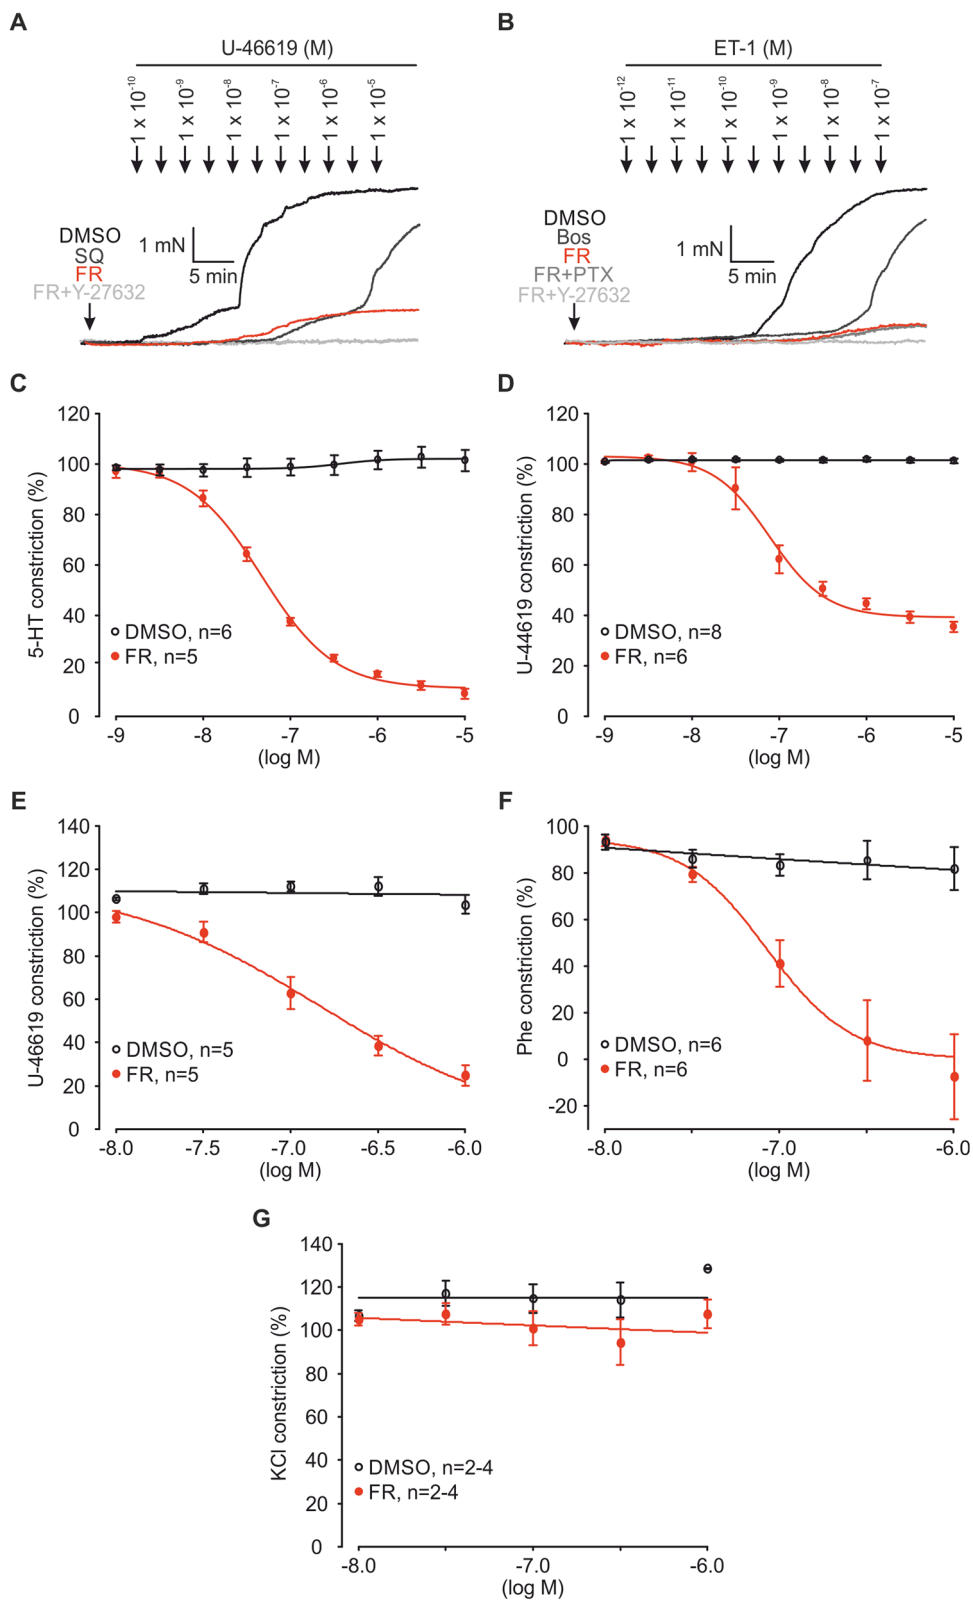

**◀ Figure EV2. FR prevents and reverses Gq-mediated constriction in mouse and pig PAs.**

(A) Original traces of U-46619 dose-response curves ( $10^{-10}$  M– $10^{-5}$  M) after pre-incubation with DMSO, SQ ( $10^{-6}$  M), FR ( $10^{-6}$  M), or FR + Y-27632 ( $10^{-5}$  M) in mouse PAs. (B) Original traces of ET-1 dose-response curves ( $10^{-12}$  M– $10^{-7}$  M) after pre-incubation with DMSO, Bos ( $10^{-6}$  M), FR ( $10^{-6}$  M), FR + PTX (1  $\mu$ g/ml) or FR + Y-27632 ( $10^{-5}$  M) in mouse PAs. (C, D) Dose-response curves of DMSO and FR ( $10^{-9}$  M– $10^{-5}$  M) after 5-HT ( $5 \times 10^{-7}$  M, DMSO:  $n = 6$ , FR:  $n = 5$ , C) or U-46619 ( $10^{-7}$  M, DMSO:  $n = 8$ , FR:  $n = 6$ , D) pre-constriction in murine PAs. (E–G) Dose-response curves of DMSO and FR ( $10^{-8}$  M– $10^{-6}$  M) after U-46619 ( $3 \times 10^{-7}$  M, DMSO:  $n = 5$ , FR:  $n = 5$ , E), Phe ( $3 \times 10^{-5}$  M, DMSO:  $n = 6$ , FR:  $n = 6$ , F), or KCl ( $3 \times 10^{-2}$  M, DMSO:  $n = 2-4$ , FR:  $n = 2-4$ , G) pre-constriction in porcine PAs. Data information: Values are expressed as mean  $\pm$  SEM. Source data are available online for this figure.

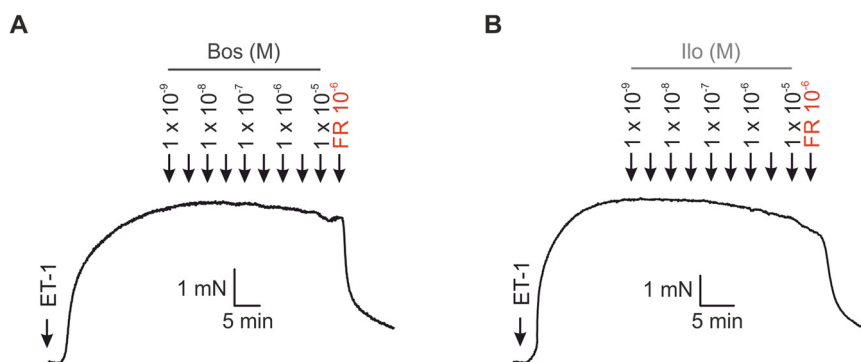

**Figure EV3. FR strongly relaxes PAs ex vivo.**

(A, B) Original traces of Bos (A) or Ilo (B) dose-response curves ( $10^{-9}$  M -  $10^{-5}$  M) followed by single dose FR ( $10^{-6}$  M) application after pre-constriction with ET-1 ( $3 \times 10^{-9}$  M) in mouse PAs.

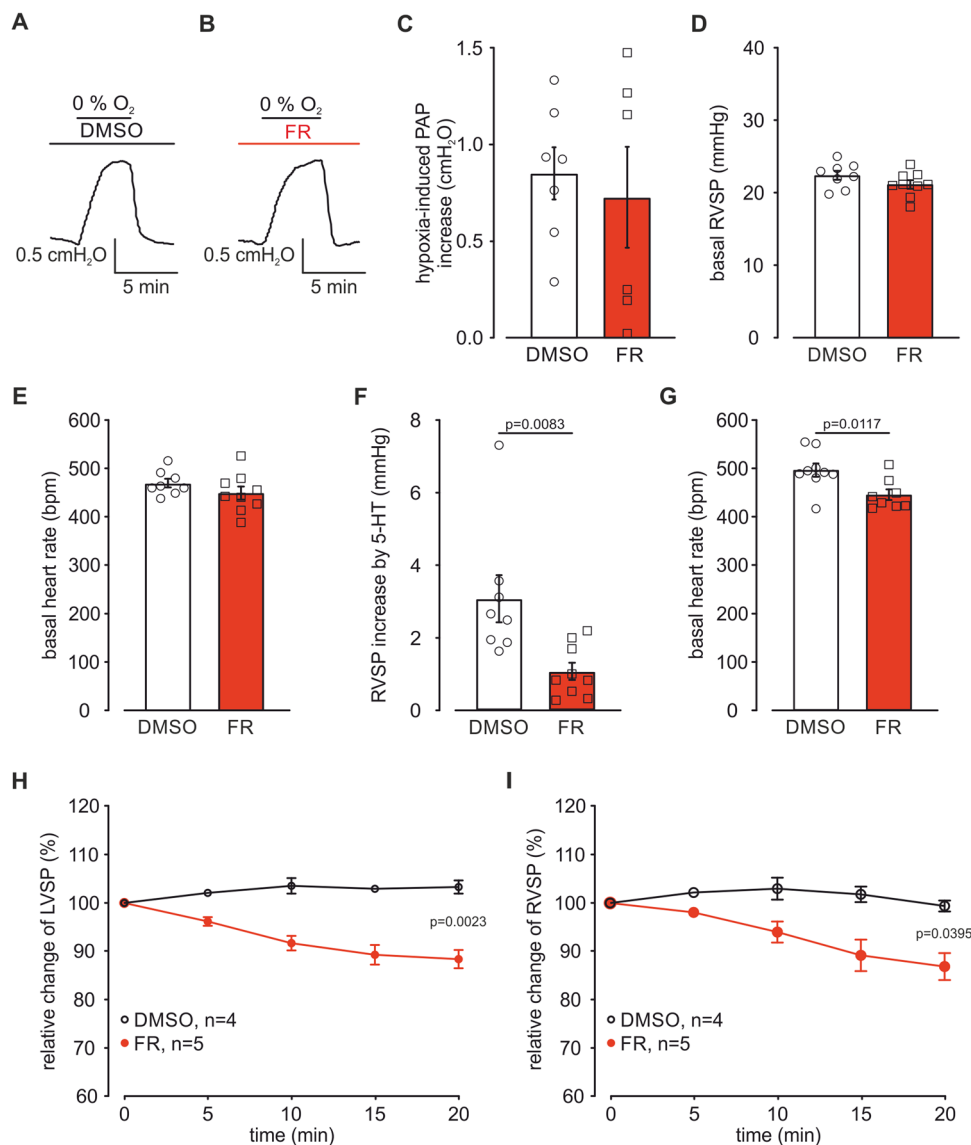

**Figure EV4. FR does not affect HPV but reduces RVSP in vivo.**

(A, B) Original traces of PAP in the IPL model during perfusion with DMSO (A) or FR (10<sup>-6</sup> M, B) and exposure to hypoxic air (0% O<sub>2</sub>/100% N<sub>2</sub>). (C) Statistical analysis of PAP increase evoked by hypoxic air during DMSO (n = 7 mice) or FR (n = 6 mice) perfusion. (D) Statistical analysis of basal RVSP 1 h after DMSO (n = 8) or FR (2.5 µg/mouse, n = 8) i.t. application in healthy mice housed under normoxic (21% O<sub>2</sub>) conditions. (E) Statistical analysis of basal heart rate in these mice (DMSO: n = 8; FR: n = 8). (F) Statistical analysis of RVSP increase in response to 5-HT (5 × 10<sup>-3</sup> M, 10 µl) i.v. bolus injection in these mice (DMSO: n = 8; FR: n = 8). (G) Basal heart rate 1 h after DMSO (n = 9) or FR (2.5 µg/mouse, 1 h before, n = 8) application in mice with pre-existing Hx-induced PH (DMSO: n = 9; FR: n = 8). (H, I) Relative change of LVSP (H) and RVSP (I) after acute DMSO (n = 4) or FR (10 µg/mouse i.p., n = 5) application in mice with pre-existing Hx-induced PH. Data information: Values are expressed as mean ± SEM. (C-G) Unpaired student's t-test. (H, I) Two-way ANOVA, Bonferroni post hoc test. Source data are available online for this figure.

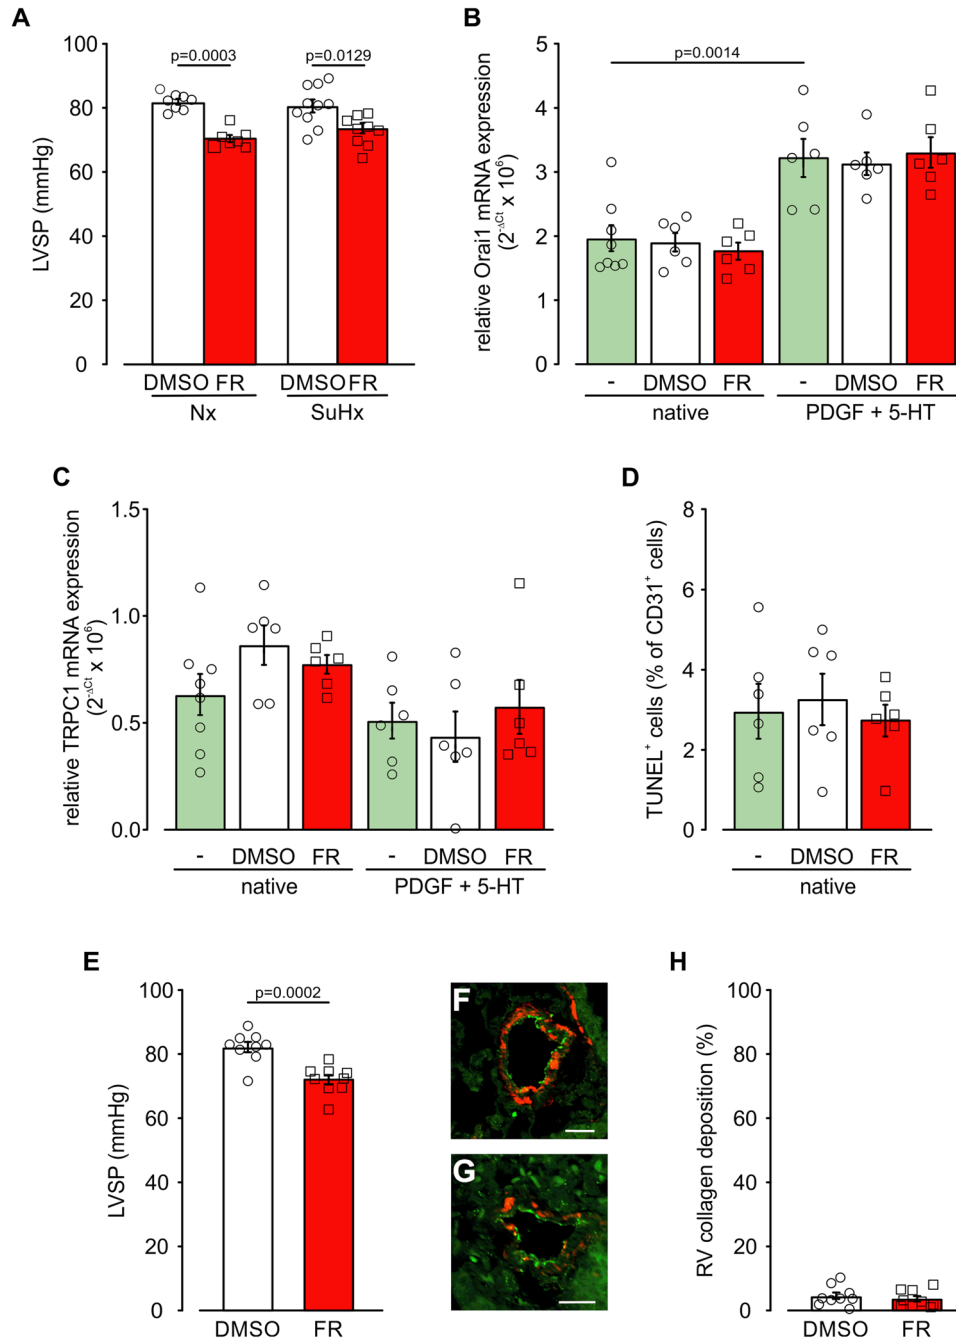

**Figure EV5. FR effects on Hx-induced PH in vivo and mPASCs as well as mLECs in vitro.**

(A) Statistical analysis of LVSP in mice treated with the solvent DMSO or FR (10 µg/mouse i.p., Monday to Friday) during exposure to Nx (21% O<sub>2</sub>, DMSO: *n* = 8, FR: *n* = 7) or SuHx (10% O<sub>2</sub>, DMSO: *n* = 10, FR: *n* = 10) for 3 weeks. (B, C) Statistical analysis of relative Orail (B) and TRPC1 (C) mRNA expression in native mPASCs (*n* = 8) and mPASCs treated with solvent DMSO or FR (10<sup>-6</sup> M) with or without additional PDGF (40 ng/ml) + 5-HT (10<sup>-6</sup> M) stimulation for 12 h, each *n* = 6 normalized to 18 S housekeeping gene, ns indicate different wells derived from at least two different passages. (D) Amount of TUNEL<sup>+</sup> CD31<sup>+</sup> mLECs after 2 days without treatment (*n* = 6) or with DMSO (*n* = 6) or FR (10<sup>-6</sup> M, *n* = 6) treatment. (E) Statistical analysis of LVSP in mice treated with the solvent DMSO (*n* = 9) or FR (10 µg/mouse i.p., Monday to Friday, *n* = 9) in the last 2 weeks of 5 weeks SuHx exposure. (F, G) vWF/α-SMAC staining of PAs in lung sections from SuHx-DMSO (F) and SuHx-FR-treated mice (G), scale bars: 20 µm. (H) Statistical analysis of collagen deposition in the right ventricle in mice treated with the solvent DMSO (*n* = 9) or FR (10 µg/mouse i.p., Monday to Friday, *n* = 9) in the last 2 weeks of 5 weeks SuHx exposure. Data information: Values are expressed as mean ± SEM. (A–D) One-way ANOVA, Tukey's post hoc test, (E, H) Unpaired student's t-test. Source data are available online for this figure.
